# Supplementary material for: Highly Efficient, Low-Cost, and Magnetically Recoverable FePt–Ag Nanocatalysts: Towards Green Reduction of Organic Dyes
Source: PubMed Central journal article supplement (PMC5977343; doi:10.3390/nano8050329), 2018-05-14
Supplement: nanomaterials-08-00329-s001.pdf [file nanomaterials-08-00329-s001.pdf]

# Highly Efficient, Low-Cost, and Magnetically Recoverable FePt–Ag Nanocatalysts: Towards Green Reduction of Organic Dyes

Yang Liu <sup>1,2,†</sup>, Yuanyuan Zhang <sup>1,2</sup>, Qiangwei Kou <sup>1,2</sup>, Yue Chen <sup>1,2</sup>, Yantao Sun <sup>2</sup>, Donglai Han <sup>3,†</sup>, Dandan Wang <sup>4</sup>, Ziyang Lu <sup>5</sup>, Lei Chen <sup>1,2</sup>, Jinghai Yang <sup>1,2,\*</sup> and Scott Guozhong Xing <sup>6,\*</sup>

<sup>1</sup> College of Physics, Jilin Normal University, Siping 136000, China; liuyang@jlnu.edu.cn (Y.L.); 13944139606@163.com (Y.Z.); 13944949603@163.com (Q.K.); 17649973053@163.com (Y.C.); chenlei@jlnu.edu.cn (L.C.)

<sup>2</sup> Key Laboratory of Functional Materials Physics and Chemistry of the Ministry of Education, Jilin Normal University, Changchun 130103, China; syt@jlnu.edu.cn

<sup>3</sup> School of Materials Science and Engineering, Changchun University of Science and Technology, Changchun 130022, China; dlhan\_1015@cust.edu.cn

<sup>4</sup> Technology Development Department, GLOBALFOUNDRIES (Singapore) Pte. Ltd., 60 Woodlands Industrial Park D, Street 2, Singapore 738406, Singapore; DANDAN.WANG@globalfoundries.com

<sup>5</sup> School of Environment and Safety Engineering, Jiangsu University, Zhenjiang 212013, China; lzy@mail.ujs.edu.cn

<sup>6</sup> United Microelect Corp. Ltd., 3 Pasir Ris Dr 12, Singapore 519528, Singapore

\* Correspondence: jhyang1@jlnu.edu.cn (J.Y.); Scott\_Xing@UMC.com (S.G.X.);  
Tel./Fax: +86-434-329-4566

† These authors contributed equally to this work.

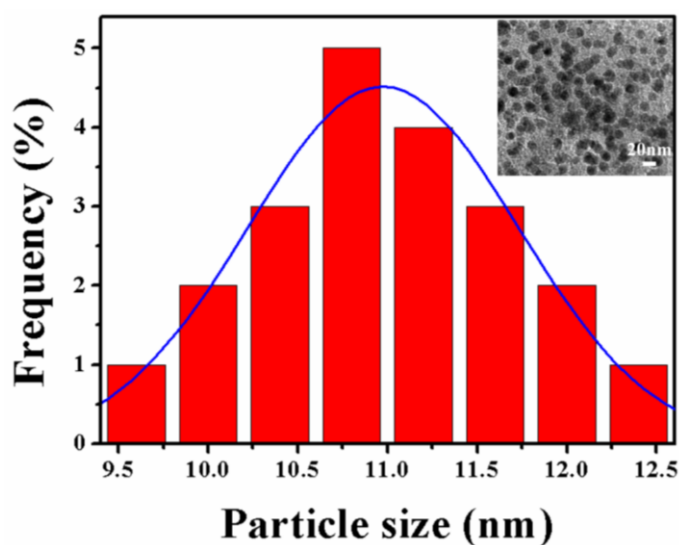

**Figure S1.** Histogram of the pure FePt nanocrystals particle size. Inset shows the corresponding TEM images of the pure FePt nanocrystals.

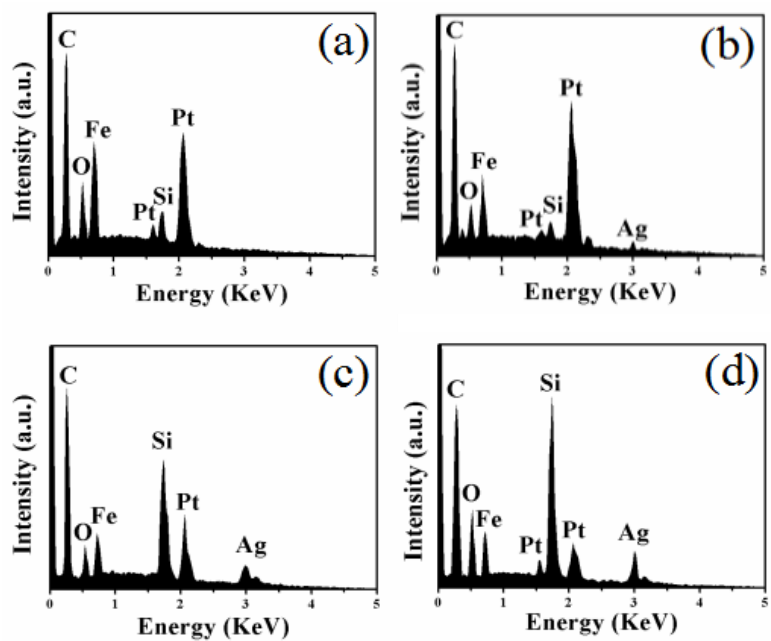

**Figure S2.** Energy-dispersive spectroscopy (EDS) spectra of FePt (a), FePt-Ag 10 mg-60 mL (b), FePt-Ag 10 mg-90 mL (c) and FePt-Ag 10 mg-120 mL (d).

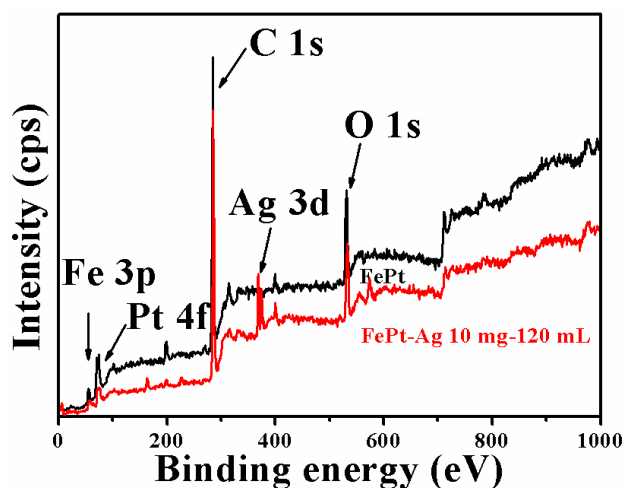

**Figure S3.** XPS survey scan spectra of pure FePt nanocrystals and FePt-Ag 10 mg-120 mL nanocomposites.

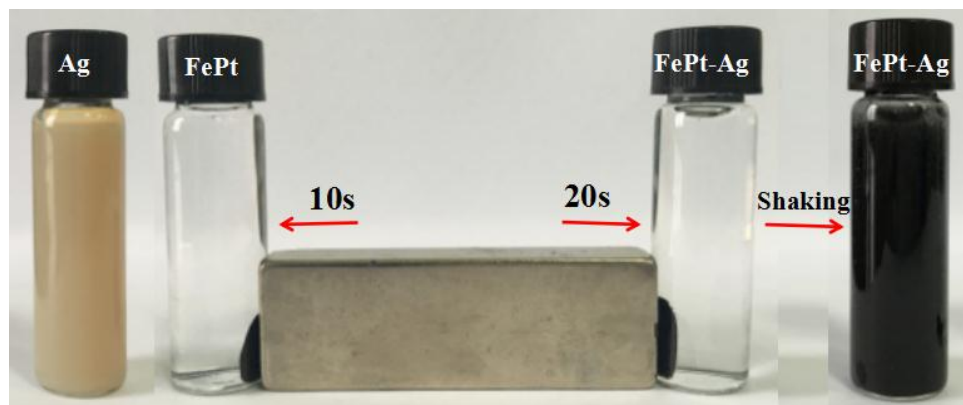

**Figure S4.** Photographs of the colloidal silver solution, FePt nanocrystals dispersed in deionized water, FePt-Ag nanocomposites dispersed in deionized water and after gentle shaking.

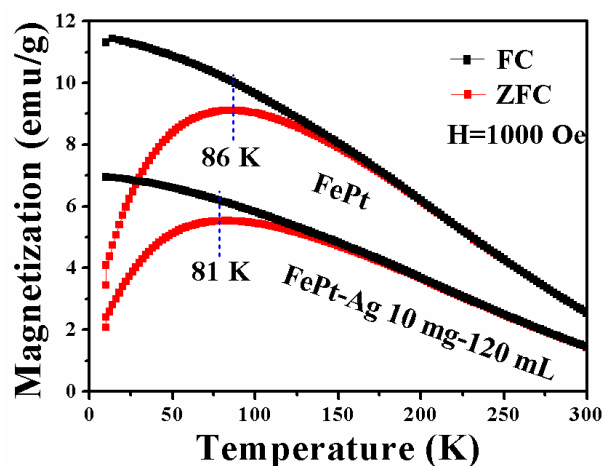

**Figure S5.** ZFC and FC curves of pure FePt nanocrystals and FePt-Ag 10 mg-120 mL nanocomposites under an applied field of 1000 Oe.

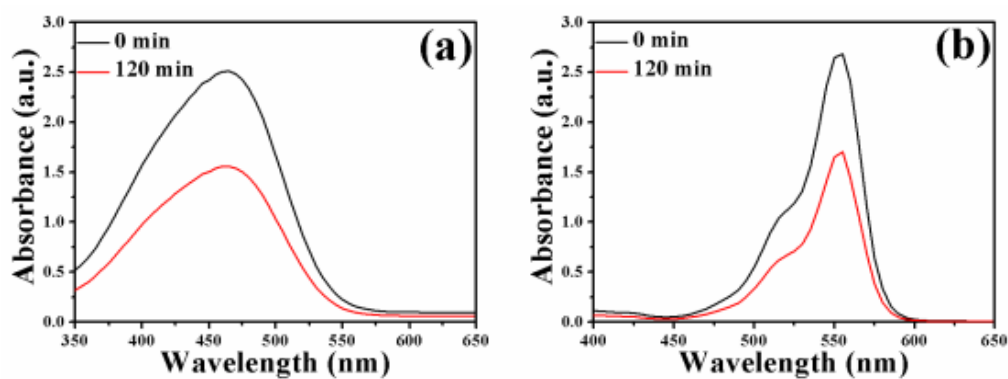

**Figure S6.** UV-Vis absorption spectra of MO aqueous solution (a) and RhB aqueous solution (b) after reduction catalyzed by pure FePt nanocrystals.

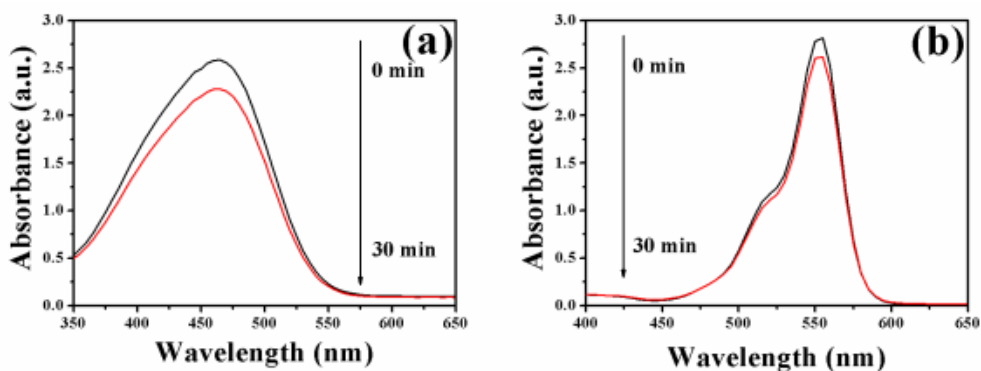

**Figure S7.** UV-Vis absorption spectra of MO (a) and RhB (b) reduced by NaBH<sub>4</sub> only.
